# Supplementary material for: Finite Adaptation and Multistep Moves in the Metropolis-Hastings Algorithm for Variable Selection in Genome-Wide Association Analysis
Source: PLOS journal article supplement (doi:10.1371/journal.pone.0049445), 2012-11-15
Supplement: S7 (10.1371/journal.pone.0049445.s007) [file journal.pone.0049445.s007]

# Finite Adaptation and Multistep Moves in the Metropolis-Hastings Algorithm for Variable Selection in Genome-Wide Association Analysis

## Supplementary Table S1

Tomi Peltola, Pekka Marttinen, and Aki Vehtari

### Posterior inclusion probability consistency

| Setting / Sampler            | intra-correlation |           |           | inter-correlation |           |           |
|------------------------------|-------------------|-----------|-----------|-------------------|-----------|-----------|
|                              | median            | IQR       | range     | median            | IQR       | range     |
| 30 causal SNPs, $H^2 = 0.2$  |                   |           |           |                   |           |           |
| adaptive MS-DR               | 1.00              | 1.00–1.00 | 0.99–1.00 | 1.00              | 1.00–1.00 | 1.00–1.00 |
| adaptive MS                  | 1.00              | 1.00–1.00 | 0.99–1.00 | 1.00              | 1.00–1.00 | 0.99–1.00 |
| adaptive SS                  | 1.00              | 0.99–1.00 | 0.98–1.00 | 1.00              | 1.00–1.00 | 0.99–1.00 |
| non-adaptive MS-DR           | 0.99              | 0.99–1.00 | 0.98–1.00 | 1.00              | 0.99–1.00 | 0.99–1.00 |
| non-adaptive MS              | 0.99              | 0.98–0.99 | 0.93–1.00 | 0.99              | 0.99–1.00 | 0.97–1.00 |
| non-adaptive SS              | 0.99              | 0.98–0.99 | 0.93–1.00 | 0.99              | 0.99–1.00 | 0.96–1.00 |
| NK10                         | 0.99              | 0.99–1.00 | 0.93–1.00 | 1.00              | 0.99–1.00 | 0.95–1.00 |
| NK05                         | 1.00              | 0.99–1.00 | 0.92–1.00 | 1.00              | 0.99–1.00 | 0.96–1.00 |
| NK01                         | 0.99              | 0.97–1.00 | 0.90–1.00 | 1.00              | 0.99–1.00 | 0.93–1.00 |
| KSC10                        | 0.99              | 0.98–1.00 | 0.94–1.00 | 1.00              | 0.99–1.00 | 0.97–1.00 |
| KSC05                        | 0.99              | 0.97–0.99 | 0.90–1.00 | 1.00              | 0.98–1.00 | 0.96–1.00 |
| KSC01                        | 0.97              | 0.94–0.98 | 0.81–1.00 | 0.98              | 0.97–0.99 | 0.84–1.00 |
| 100 causal SNPs, $H^2 = 0.2$ |                   |           |           |                   |           |           |
| adaptive MS-DR               | 1.00              | 0.99–1.00 | 0.99–1.00 | 1.00              | 1.00–1.00 | 0.99–1.00 |
| adaptive MS                  | 1.00              | 0.99–1.00 | 0.99–1.00 | 1.00              | 1.00–1.00 | 1.00–1.00 |
| adaptive SS                  | 0.99              | 0.98–0.99 | 0.93–1.00 | 0.99              | 0.99–1.00 | 0.96–1.00 |
| non-adaptive MS-DR           | 0.98              | 0.97–0.99 | 0.93–0.99 | 0.99              | 0.99–0.99 | 0.97–1.00 |
| non-adaptive MS              | 0.98              | 0.97–0.99 | 0.95–0.99 | 0.99              | 0.99–0.99 | 0.97–1.00 |
| non-adaptive SS              | 0.97              | 0.97–0.98 | 0.93–0.99 | 0.99              | 0.98–0.99 | 0.95–1.00 |
| NK10                         | 1.00              | 0.99–1.00 | 0.96–1.00 | 1.00              | 1.00–1.00 | 0.98–1.00 |
| NK05                         | 0.99              | 0.99–1.00 | 0.98–1.00 | 1.00              | 1.00–1.00 | 0.98–1.00 |
| NK01                         | 0.99              | 0.98–0.99 | 0.86–1.00 | 0.99              | 0.99–1.00 | 0.95–1.00 |
| KSC10                        | 0.99              | 0.99–0.99 | 0.95–1.00 | 1.00              | 0.99–1.00 | 0.97–1.00 |
| KSC05                        | 0.99              | 0.98–0.99 | 0.96–1.00 | 0.99              | 0.99–1.00 | 0.98–1.00 |
| KSC01                        | 0.98              | 0.97–0.98 | 0.94–0.99 | 0.99              | 0.99–0.99 | 0.97–1.00 |

| Setting / Sampler            | intra-correlation |           |           | inter-correlation |           |           |
|------------------------------|-------------------|-----------|-----------|-------------------|-----------|-----------|
|                              | median            | IQR       | range     | median            | IQR       | range     |
| 30 causal SNPs, $H^2 = 0.5$  |                   |           |           |                   |           |           |
| adaptive MS-DR               | 1.00              | 1.00–1.00 | 0.98–1.00 | 1.00              | 1.00–1.00 | 0.99–1.00 |
| adaptive MS                  | 1.00              | 1.00–1.00 | 0.91–1.00 | 1.00              | 1.00–1.00 | 0.94–1.00 |
| adaptive SS                  | 1.00              | 0.99–1.00 | 0.93–1.00 | 1.00              | 0.99–1.00 | 0.97–1.00 |
| non-adaptive MS-DR           | 0.99              | 0.99–1.00 | 0.92–1.00 | 1.00              | 0.99–1.00 | 0.97–1.00 |
| non-adaptive MS              | 0.99              | 0.98–0.99 | 0.94–1.00 | 0.99              | 0.99–1.00 | 0.92–1.00 |
| non-adaptive SS              | 0.99              | 0.98–1.00 | 0.89–1.00 | 0.99              | 0.99–1.00 | 0.95–1.00 |
| NK10                         | 1.00              | 0.98–1.00 | 0.87–1.00 | 1.00              | 0.99–1.00 | 0.93–1.00 |
| NK05                         | 0.99              | 0.99–1.00 | 0.85–1.00 | 1.00              | 0.99–1.00 | 0.94–1.00 |
| NK01                         | 0.99              | 0.97–1.00 | 0.83–1.00 | 0.99              | 0.99–1.00 | 0.94–1.00 |
| KSC10                        | 0.99              | 0.97–0.99 | 0.86–1.00 | 0.99              | 0.99–1.00 | 0.93–1.00 |
| KSC05                        | 0.99              | 0.97–0.99 | 0.88–1.00 | 0.99              | 0.99–1.00 | 0.91–1.00 |
| KSC01                        | 0.90              | 0.76–0.95 | 0.34–1.00 | 0.96              | 0.86–0.99 | 0.43–1.00 |
| 100 causal SNPs, $H^2 = 0.5$ |                   |           |           |                   |           |           |
| adaptive MS-DR               | 0.99              | 0.99–1.00 | 0.99–1.00 | 1.00              | 1.00–1.00 | 0.99–1.00 |
| adaptive MS                  | 0.99              | 0.99–0.99 | 0.94–1.00 | 0.99              | 0.99–1.00 | 0.95–1.00 |
| adaptive SS                  | 0.99              | 0.98–0.99 | 0.96–0.99 | 0.99              | 0.99–0.99 | 0.97–1.00 |
| non-adaptive MS-DR           | 0.98              | 0.97–0.98 | 0.94–0.99 | 0.99              | 0.99–0.99 | 0.98–1.00 |
| non-adaptive MS              | 0.97              | 0.96–0.98 | 0.87–0.99 | 0.98              | 0.98–0.99 | 0.93–0.99 |
| non-adaptive SS              | 0.97              | 0.96–0.98 | 0.94–0.99 | 0.98              | 0.98–0.99 | 0.96–0.99 |
| NK10                         | 0.99              | 0.99–1.00 | 0.93–1.00 | 1.00              | 0.99–1.00 | 0.96–1.00 |
| NK05                         | 0.99              | 0.98–0.99 | 0.96–1.00 | 1.00              | 0.99–1.00 | 0.97–1.00 |
| NK01                         | 0.98              | 0.97–0.99 | 0.94–1.00 | 0.99              | 0.99–1.00 | 0.96–1.00 |
| KSC10                        | 0.99              | 0.98–0.99 | 0.93–1.00 | 0.99              | 0.99–1.00 | 0.97–1.00 |
| KSC05                        | 0.98              | 0.98–0.99 | 0.94–0.99 | 0.99              | 0.99–0.99 | 0.97–1.00 |
| KSC01                        | 0.98              | 0.96–0.98 | 0.93–0.99 | 0.99              | 0.98–0.99 | 0.94–1.00 |

Intra-correlation: Correlations between the three chains (chain 1 vs chain 2, 1 vs 3, 2 vs 3) pooled for the 20 datasets in each simulation configuration and the statistics computed from the 60 (20 x 3) values for each sampler.

Inter-correlation: Correlations of each chain against the mean posterior inclusion probabilities over all chains and samplers (chain 1 vs mean, 2 vs mean, 3 vs mean) for the 20 datasets pooled and the statistics computed from the 60 (20 x 3) values for each sampler.

Statistics: median, inter-quartile range (IQR) and range (minimum and maximum values).
