# Supplementary material for: Finite Adaptation and Multistep Moves in the Metropolis-Hastings Algorithm for Variable Selection in Genome-Wide Association Analysis
Source: PLOS journal article supplement (doi:10.1371/journal.pone.0049445), 2012-11-15
Supplement: S11 (10.1371/journal.pone.0049445.s011) [file journal.pone.0049445.s011]

# Finite Adaptation and Multistep Moves in the Metropolis-Hastings Algorithm for Variable Selection in Genome-Wide Association Analysis

## Supplementary Table S5

Tomi Peltola, Pekka Marttinen, and Aki Vehtari

### Sampling time, ESS, ESS/time and relative efficiency for the LDL-C and HDL-C datasets

Geometric mean values of sampling time (seconds), ESS, ESS/time and relative efficiency for the simulated datasets. ESSs are based on the autocorrelation of  $\gamma$  and model size samples.

| Setting / Sampler | Time  | $\gamma$ |          |     | model size |          |     |  |
|-------------------|-------|----------|----------|-----|------------|----------|-----|--|
|                   |       | ESS      | ESS/time | RE  | ESS        | ESS/time | RE  |  |
| HDL-C             |       |          |          |     |            |          |     |  |
| adaptive MS-DR    | 45205 | 12080    | 0.27     | 2.8 | 343        | 0.01     | 1.3 |  |
| adaptive MS       | 42753 | 8240     | 0.19     | 2.0 | 286        | 0.01     | 1.1 |  |
| adaptive SS       | 35005 | 3346     | 0.10     | 1.0 | 204        | 0.01     | 1.0 |  |
| LDL-C             |       |          |          |     |            |          |     |  |
| adaptive MS-DR    | 41071 | 8216     | 0.20     | 1.3 | 569        | 0.01     | 1.4 |  |
| adaptive MS       | 38626 | 5155     | 0.13     | 0.9 | 443        | 0.01     | 1.2 |  |
| adaptive SS       | 35567 | 5478     | 0.15     | 1.0 | 353        | 0.01     | 1.0 |  |
